# Supplementary material for: The Complete Genome Sequence of Mycoplasma bovis Strain Hubei-1
Source: PLoS One. 2011 Jun 22;6(6):e20999. doi: 10.1371/journal.pone.0020999 (PMC3120828; doi:10.1371/journal.pone.0020999)
Supplement: Table S3 — Tandem repeats in M.bovis (XLS) [file pone.0020999.s004.xls]

## Sheet: Sheet1
Table S3 Tandem repeats in M.bovis
Start	End	Repeat Length (bp)	Repeat Unit Size (bp)	Rpeat Unit bases	Number of Repeats	Affected Gene	Repeats relative to CDS
32455	32478	24	10	AGAAAGGTTT	2.4	MMB_0032	upstream
173606	173664	59	6	AAATAA	9.83333	MMB_0146	upstream
447723	447746	24	10	TAAAGACAGT	2.4	MMB_0376	upstream
552021	552042	22	10	TTTTCTTCTT	2.2	MMB_0457	upstream
578519	578545	27	13	ATTAATCCTTAAA	2.07692	MMB_0477	upstream
59018	59046	29	14	CTAATTTTAATATG	2.07143	MMB_0046	upstream
77026	77055	30	14	TTATTTTTATAATA	2.14286	MMB_0064	upstream
132559	132584	26	13	TTTTACAAAAAAA	2	MMB_0115	upstream
357395	357422	28	12	AAAGAATAAAGA	2.33333	MMB_0294	upstream
441469	441500	32	12	TTTTATTGTTGC	2.66667	MMB_0370	upstream
893267	893295	29	12	TCTTTTCTTTAT	2.41667	MMB_0758	upstream
893361	893390	30	13	TTTAATTTAAGAA	2.30769	MMB_0758	upstream
162771	162793	23	11	TTATAATTTTA	2.09091	MMB_0138	upstream
308659	308684	26	11	AAACAAATAGA	2.36364	MMB_0260	upstream
384089	384128	40	2	TC	20	MMB_0316	upstream
397878	397898	21	2	TC	10.5	MMB_0325	upstream
403471	403494	24	3	TTA	8	MMB_0329	upstream
431089	431156	68	24	GAAAAAAATAGAGGAAGAAAAGAA	2.83333	MMB_0358	upstream
503255	503281	27	12	CTTTTCTTTATG	2.25	MMB_0422	upstream
526497	526542	46	22	TAGTTTTAAATTATAAAATAAT	2.09091	MMB_0434	upstream
592811	592897	87	9	TTTCTCTTC	9.66667	MMB_0485	upstream
619229	619252	24	12	AAGCACAAAATT	2	MMB_0509	upstream
655979	656009	31	13	AATAGTAAATGTA	2.38462	MMB_0540	upstream
671569	671599	31	5	TATTA	6.2	MMB_0554	upstream
768017	768033	17	2	TC	8.5	MMB_0644	upstream
796116	796143	28	14	AGTTTTTATTTTAG	2	MMB_0657	upstream
834436	834458	23	4	TTTA	5.75	MMB_0694	upstream
931697	931719	23	4	TTTA	5.75	MMB_0794	upstream
655875	655901	27	4	TTAA	6.75	MMB_0539,MMB_0540	upstream
159551	159753	203	75	AAACATTTAACTCATATTTTCAACATTTGCAGTATTTCATTTATCTATATTTTTGCTGAAGTTTTTAGCACCAAA	2.70667	MMB_0137	Inside
160217	160452	236	75	ATTATTTTTACCAGGATCAGTAGGTGGAGCGATTGGAGCATCCATTTCAGGTTCCTTTTTAGGCTCCTTAGTTTC	3.14667	MMB_0137	Inside
172703	172734	32	15	ACTAAAAAAGAAATT	2.13333	MMB_0146	Inside
369521	369540	20	10	CATCGCTTTT	2	MMB_0303	Inside
411806	411835	30	12	TTTAACTTCAAC	2.5	MMB_0341	Inside
516120	516143	24	12	ATTAAGTAATGA	2	MMB_0429	Inside
574991	575026	36	5	CTTCT	7.2	MMB_0476	Inside
577693	577720	28	14	TTTTCAAGCCTTCT	2	MMB_0477	Inside
581884	581924	41	15	TTGTTATGAAATTCG	2.73333	MMB_0479	Inside
788782	788812	31	15	TAATTTCAGTTGCAA	2.06667	MMB_0654	Inside
788797	788825	29	12	TAATTTCAGGAG	2.41667	MMB_0654	Inside
41453	41472	20	10	GTTATCTTTA	2	MMB_0038	Inside
59766	59792	27	13	AGTGAATAAGGCA	2.07692	MMB_0046	Inside
59714	59754	41	4	TATT	10.25	MMB_0046	Inside
108762	108785	24	10	TTTAGAAAGT	2.4	MMB_0095	Inside
108820	108839	20	10	AATTAATCTT	2	MMB_0095	Inside
227769	227795	27	12	CATATCCTATAA	2.25	MMB_0188	Inside
306776	306800	25	12	GAAGAAATCATT	2.08333	MMB_0258	Inside
306805	306829	25	11	AATATATGACG	2.27273	MMB_0258	Inside
409544	409582	39	18	ATTGAAGAAAAAGAAATA	2.16667	MMB_0338	Inside
409595	409623	29	13	TTTTTCATAATTT	2.23077	MMB_0338	Inside
567961	567992	32	10	TATTATCATT	3.2	MMB_0471	Inside
569753	569775	23	10	TTTAAATTAT	2.3	MMB_0471	Inside
572272	572297	26	11	TATTAAGCTAT	2.36364	MMB_0475	Inside
572328	572355	28	10	AAGAATAAAT	2.8	MMB_0475	Inside
644061	644092	32	12	TGAAAATAAAAA	2.66667	MMB_0530	Inside
754093	754112	20	10	TATTAAATTC	2	MMB_0632	Inside
754186	754210	25	12	TCAAAGTTGTCT	2.08333	MMB_0632	Inside
815393	815416	24	12	AAAATTCTGATA	2	MMB_0675	Inside
816314	816333	20	10	ATATTGATAC	2	MMB_0675	Inside
881581	881636	56	12	TAGATGAAGAAT	4.66667	MMB_0744	Inside
444252	444291	40	8	ATAAAGAA	5	MMB_0372	Inside
24387	24406	20	10	ATTTTGATTT	2	MMB_0024	Inside
96737	96765	29	12	TATTTAAAAACT	2.41667	MMB_0078	Inside
134927	134953	27	12	AAAATTAATGAA	2.25	MMB_0116	Inside
197510	197534	25	11	AATTCAAATGT	2.27273	MMB_0167	Inside
241555	241579	25	10	AAAAGATGCT	2.5	MMB_0203	Inside
242146	242184	39	17	ATGAAAAACAACTTCTA	2.29412	MMB_0203	Inside
309409	309436	28	11	AACAATGTGAA	2.54545	MMB_0261	Inside
309432	309457	26	11	AAAATTATTGG	2.36364	MMB_0261	Inside
321822	321865	44	21	AAGTTTTTTAATAGCTTCTTT	2.09524	MMB_0269	Inside
324447	324473	27	13	ATATACTTATTTA	2.07692	MMB_0270	Inside
325315	325350	36	13	ACTTAGCTGAAAC	2.76923	MMB_0271	Inside
330589	330615	27	12	TTAGAATCAAAT	2.25	MMB_0275	Inside
384300	384680	381	39	ATCTAACTCAGGAAACCAAGGTTCAAAAACCGACTCAGA	9.76923	MMB_0316	Inside
400592	400633	42	20	TTAGTTATTAGTTCTAATTA	2.1	MMB_0328	Inside
400730	400758	29	12	AATAATAATTCA	2.41667	MMB_0328	Inside
401413	401449	37	13	TGATAAAAACAAT	2.84615	MMB_0328	Inside
407327	407359	33	6	TGGAAA	5.5	MMB_0334	Inside
425087	425107	21	10	ATATCCAAGA	2.1	MMB_0351	Inside
431706	432002	297	75	AGACTTAAATAAATGAAATGTTTCTAATGTAACAAATATGAAAGGAATGTTTTTTGGAGCAAAAAAATTTAACCA	3.96	MMB_0358	Inside
441108	441134	27	12	AAGCATTCGAGA	2.25	MMB_0368	Inside
503898	503928	31	11	AAAGTTAAGGG	2.81818	MMB_0422	Inside
517369	517583	215	74	ATGTTTTATGACGCAAAAAACTTTAATTCAAAACTTAATTTTATAGATACAAGAAATTTAAAAATATAAAAGGA	2.90541	MMB_0429	Inside
519683	519709	27	11	ATTTAGAGAGA	2.45455	MMB_0430	Inside
520362	520525	164	51	AAACCATCAGAACAAGGTTCAGGAACTAACTCACAACAAGGTTCAGGAACT	3.21569	MMB_0431	Inside
520713	520760	48	6	CCAGAT	8	MMB_0431	Inside
526081	526100	20	10	TTGCTTTCTT	2	MMB_0434	Inside
526174	526332	159	69	TCTTCTTGCTTTTGTTTATCTTGATTTTGTGGGATAGTATCTGGAGAAGAATTACCAGAACCATTAGGT	2.30435	MMB_0434	Inside
526417	526455	39	18	ATTGAAGAAAAAGAAATA	2.16667	MMB_0434	Inside
526468	526495	28	12	TTTTTCATAAAT	2.33333	MMB_0434	Inside
528892	528927	36	17	TATAAAAAAGATTTTAA	2.11765	MMB_0436	Inside
529940	529955	16	3	CAT	5.33333	MMB_0438	Inside
593010	593054	45	9	TTCATTTTT	5	MMB_0486	Inside
606805	606850	46	12	ATTGATGAAAAA	3.83333	MMB_0497	Inside
643390	643441	52	20	TGTGCTTTTTTGAATGTTTT	2.6	MMB_0530	Inside
645816	645847	32	12	GGTGTTGGTACT	2.66667	MMB_0531	Inside
658217	658242	26	12	AATTATTGCATC	2.16667	MMB_0541	Inside
664276	664302	27	12	TTAAAGGCTATT	2.25	MMB_0547	Inside
735679	736000	322	71	ATACTGCCCCACAAACTCAAGATAATATCAAAAGCAAGAAAAACCTAGTGATTCTGGTAATTCATCTACGG	4.53521	MMB_0614	Inside
736054	736101	48	20	AAATTAAAAAAGAAAATGAA	2.4	MMB_0614	Inside
737211	737377	167	51	AAAAGTAGCTGAAAAAGAAAACAAAGATCCAGTTAAAAAAGAAGATTCTAA	3.27451	MMB_0616	Inside
768461	768531	71	27	AAATCAGAAAAACAAGATTCAAAAACT	2.62963	MMB_0644	Inside
775823	775849	27	4	CTTT	6.75	MMB_0650	Inside
832539	832580	42	5	TTTTC	8.4	MMB_0691	Inside
703058	703218	161	60	TTTGTACTTGAAGTTGATTTTGTTTCAGCTGGTTTTTTAGCAGCAGCAGAAGTAGTTTTC	2.68333
409077	409417	341	69	TTTTGATTATCTTTAGTTTGTGGGTCAGCATCTGAAGAAGAATTACCAGAACCATTAGGGTTTTCATGA	4.94203
232182	232308	127	60	TGATGAAGCAGGCGAATCGCTTTGAGTTCCAGAATCTGTACGAGATGTGCTTGAAGAACT	2.11667
233502	233675	174	60	TGATGAAGCAGGCGAATCGCTTTGAGTTCCAGAATCTGTACGAGATGTGCTTGAAGAGCT	2.9
438446	438516	71	29	GAATAAAACAATCAATATAAGAAGACAAG	2.44828
439511	439567	57	27	AAACTAGAAGAAAAAGAAGAAAAAAAA	2.11111
104130	104193	64	25	AATCAAAATGAAATTGCTAAAAAAT	2.56
727970	728030	61	25	AAATCATCATCTTCAAATTTTCAAT	2.44
43680	43728	49	22	TTAAATCTATCAACAATTGTAT	2.22727
335866	335913	48	22	TAAATATGAAAAAAATAAAAAA	2.18182
863464	863535	72	22	TTTTGTTAGAAAATTTACCAAA	3.27273
246527	246576	50	21	AACTTTTACATTAAGTCTATC	2.38095
659951	659992	42	21	AAAATAAGGCAATTAACAAAA	2
678437	678487	51	21	CTTCAGTAATTTTGCCAACAC	2.42857
770609	770652	44	21	AAAATATAAAAGCAATATAAA	2.09524
71211	71251	41	20	ATTTTTTCATTAAGGCAATA	2.05
83661	83702	42	20	AAAAAACATAAAAAGTAATT	2.1
443872	443922	51	20	ATTAGATAAAACTAAAGACA	2.55
549823	549868	46	20	AAATAATCTTTGTGGCAATG	2.3
477585	477630	46	19	TATTATAAATCTAAGTTGA	2.42105
521726	521771	46	19	TTTCTAATATGGATTTATC	2.42105
795904	795941	38	19	ATATATTCATTTTTATCTG	2
6047	6087	41	18	ATTTAGAAAATTTAATGT	2.27778
37154	37189	36	18	AAATATTACAACTGGGAA	2
148584	148645	62	18	TTATAAAAATAAAAAATA	3.44444
291587	291623	37	18	TTCATTTGCAAAAAAAAA	2.05556
350894	350943	50	18	ATACTAATATTAAATTTT	2.77778
415948	415988	41	18	ATTTAGAAAATTTAATGT	2.27778
482099	482135	37	18	AAAAAGTGCTTTTTTATT	2.05556
640581	640621	41	18	AAATTTCTTCACCAACAG	2.27778
701925	701972	48	18	TTTTTCTGCAATCTTTTC	2.66667
801376	801419	44	18	TTCAAAAAAGAATAGAGT	2.44444
811247	811284	38	18	TTGCTTTTCATGTAATAA	2.11111
7012	7047	36	17	TTCAAAGAAAATAATAA	2.11765
152724	152760	37	17	ATTCAAAAACAAATGAA	2.17647
85051	85084	34	16	AAAATTAATAGAAATT	2.125
259708	259750	43	16	TTCTTTATTAAAAGCA	2.6875
279412	279445	34	16	TTAAATTTATATAAAA	2.125
354222	354253	32	16	TTTGATTATCATATTT	2
19928	19965	38	15	AATTCAAACAGCGAA	2.53333
181666	181700	35	15	TTTATAAATTATTCA	2.33333
227006	227036	31	15	AATCTAAAATAAGAT	2.06667
342906	342940	35	15	CTCTTTTAGTGCTAA	2.33333
373925	373956	32	15	ATTTGATAAAACAGC	2.13333
398315	398362	48	15	CAGAAAAACAAGATT	3.2
519252	519284	33	15	AAATTTGATCCATCT	2.2
673631	673662	32	15	TACTCATATGTTTAT	2.13333
700429	700458	30	15	CTTCATTAACAAATA	2
701982	702011	30	15	TTCAACTTTGGCTTT	2
711319	711353	35	15	AATTAAGAAATAAAA	2.33333
751038	751068	31	15	ATAAAAATGATAATT	2.06667
187711	187744	34	14	AATTTTAATTACAT	2.42857
223502	223529	28	14	AATCAGCTAATGAA	2
251915	251959	45	14	ATTATTTTTAATAA	3.21429
258758	258786	29	14	TTTGCATTTAATTT	2.07143
266107	266135	29	14	TAATTATTTAAGTA	2.07143
555341	555368	28	14	AACAAAATAATTAA	2
739035	739071	37	14	AATAATTGTCCCTA	2.64286
882053	882085	33	14	AAAAAAAGATAAAG	2.35714
946986	947020	35	14	AAATTATTAAAAAT	2.5
17658	17685	28	13	AAGAATTGTCACA	2.15385
255253	255280	28	13	TAAATGAAGACAT	2.15385
310843	310868	26	13	TTTTTTTATGTAG	2
382574	382601	28	13	AAATAAAATAGAA	2.15385
417616	417652	37	13	AAAAATTAAAATA	2.84615
433379	433418	40	13	TAATGAAAGGTAA	3.07692
454822	454857	36	13	ATATAAATTTCTG	2.76923
468342	468381	40	13	ATTATAATATAAA	3.07692
496735	496772	38	13	TTTTGCAAATTTT	2.92308
557656	557682	27	13	AAAAAATACAGCT	2.07692
691088	691119	32	13	ATTTTGTAAAAAT	2.46154
705593	705624	32	13	TTCTTTTAGATAG	2.46154
822463	822490	28	13	CATTTTCCAAAAA	2.15385
824044	824070	27	13	ATAAACAATAGGA	2.07692
881919	881945	27	13	TTTAAAATATTAA	2.07692
79031	79065	35	12	ATGAGAATTCAA	2.91667
155720	155755	36	12	TTTTTATTATAA	3
176824	176847	24	12	AAAATAGCAGGT	2
194106	194133	28	12	AAAGAATAAAGA	2.33333
213090	213121	32	12	AAGAAAAAAAAA	2.66667
221978	222006	29	12	AAAATGTAAAAG	2.41667
230422	230448	27	12	CTTTTCTTTATG	2.25
235062	235087	26	12	AGAATAATTAAA	2.16667
254681	254706	26	12	AATAAATATAAA	2.16667
267933	267957	25	12	TTCAAGAAATTT	2.08333
287339	287362	24	12	TTTTTCATTGTG	2
289121	289144	24	12	AACTTTAAAACT	2
300589	300613	25	12	TTTTGTTAATTG	2.08333
313425	313453	29	12	TCATCTAAAAAT	2.41667
315271	315294	24	12	ATTAGCCATAAA	2
341837	341862	26	12	CTTCTTCTTTTG	2.16667
349234	349257	24	12	TTTAAATTCTTC	2
365384	365412	29	12	TCATCTAAAAAT	2.41667
371688	371711	24	12	CACCAACAGTAT	2
374874	374900	27	12	GTTAGCGCTACT	2.25
381551	381578	28	12	CAAATGAAACAA	2.33333
383490	383513	24	12	AAAATTATTGAA	2
393786	393809	24	12	CAAAGACTTTAT	2
399018	399045	28	12	AAAGAATAAAGA	2.33333
409773	409800	28	12	AAAGAATAAAGA	2.33333
432254	432288	35	12	TTTTTTTCAAAA	2.91667
445977	446000	24	12	AATGAAAATAAT	2
467388	467412	25	12	ATGATAATTCAA	2.08333
477641	477667	27	12	ATGATTTAAAAA	2.25
496275	496303	29	12	TTTTTGTTCTAG	2.41667
512323	512348	26	12	TTTACAATTCAA	2.16667
522616	522639	24	12	TATGAGTAATTA	2
550181	550210	30	12	TCTTTTCAAACA	2.5
618253	618278	26	12	TAAAAACAAAGA	2.16667
619732	619756	25	12	GGTGAAAAAATA	2.08333
630204	630228	25	12	AATTACAAAAAT	2.08333
634076	634104	29	12	TCATCTAAAAAT	2.41667
637162	637185	24	12	ATCTTTATACTT	2
650692	650715	24	12	AACAAAAAGGAT	2
660193	660216	24	12	ACAATTTCAAAA	2
667754	667786	33	12	AAAAAATAGAAA	2.75
669112	669137	26	12	CAAGTTAAAAAA	2.16667
677093	677120	28	12	TGCTGCTTCTGA	2.33333
693321	693349	29	12	TCATCTAAAAAT	2.41667
703035	703061	27	12	TTGATGTAGTTT	2.25
704663	704687	25	12	AAAAGTAGGTTA	2.08333
762526	762553	28	12	TTTCTAAATTAA	2.33333
778459	778487	29	12	GATGAAATATTA	2.41667
781682	781715	34	12	CATTAAAAACAC	2.83333
801756	801781	26	12	AAGAAATTAATC	2.16667
803719	803743	25	12	AGAAAATAACAA	2.08333
808286	808314	29	12	TCATCTAAAAAT	2.41667
822634	822660	27	12	TTGCATCTTCAA	2.25
830377	830413	37	12	CTGATGGATTAT	3.08333
835058	835087	30	12	AAATAGATTTTT	2.5
837957	837985	29	12	GATGAAATATTA	2.41667
902742	902767	26	12	TTAATAATATCA	2.16667
922373	922401	29	12	TCTTTTCTTTAT	2.41667
925423	925447	25	12	GCTGCTAAAGCT	2.08333
928097	928125	29	12	TCATCTAAAAAT	2.41667
933807	933835	29	12	GATGAAATATTA	2.41667
1439	1473	35	11	AAAAACAGCAA	3.18182
1762	1787	26	11	AAAGTATTTCA	2.36364
15925	15948	24	11	TTTCTATCATT	2.18182
58253	58305	53	11	AATTAAAAAAG	4.81818
92914	92941	28	11	AAAATATCAAG	2.54545
98673	98698	26	11	AATTTAGAAGA	2.36364
114538	114572	35	11	ACAAAAGAATA	3.18182
143083	143108	26	11	AATATGATCTT	2.36364
167529	167552	24	11	AAAATTTAAAG	2.18182
171192	171213	22	11	TGAAGCAAAAA	2
192491	192530	40	11	AAATTTATTTG	3.63636
259875	259898	24	11	AATAATAAGCA	2.18182
286242	286265	24	11	AATGAAAAATG	2.18182
297323	297354	32	11	GAATTTATTAT	2.90909
298853	298874	22	11	ATGACAAAAAA	2
307205	307228	24	11	TAAAATAATTT	2.18182
380922	380943	22	11	TCTTTAAATTA	2
382227	382257	31	11	AATATTTTAAT	2.81818
428052	428079	28	11	TAATTACTCGA	2.54545
514576	514598	23	11	AAACATATAAA	2.09091
522675	522698	24	11	AAAACAGTATA	2.18182
532955	532978	24	11	TTTTAGTACTT	2.18182
554261	554297	37	11	AAAATACTATA	3.36364
591731	591757	27	11	AAAAATATTCA	2.45455
653359	653380	22	11	TCATATTATTT	2
657893	657915	23	11	ATATGAAAAAG	2.09091
666781	666802	22	11	CAAAATATTAA	2
678970	678991	22	11	TTAATCGATTC	2
691672	691694	23	11	ATCCTATATCA	2.09091
705953	705974	22	11	TTTCCAAATTT	2
740182	740215	34	11	TTTTCAAATAC	3.09091
747933	747954	22	11	GTTCATCAATG	2
854052	854078	27	11	TAATGTTGGAA	2.45455
857860	857890	31	11	AAAAATTACTC	2.81818
910862	910887	26	11	TTGAGCAACTT	2.36364
914432	914454	23	11	TTTGCCATTTT	2.09091
916787	916809	23	11	CCGTTGAACTA	2.09091
919316	919339	24	11	TTTCTACAATT	2.18182
937369	937393	25	11	AAAATGGATTG	2.27273
5335	5356	22	10	TTCTAGACAT	2.2
15812	15831	20	10	ATCAAAATTT	2
39280	39303	24	10	TTTCATATAC	2.4
47240	47260	21	10	TCTAAGTTGT	2.1
52938	52964	27	10	TCAAGAATTA	2.7
58881	58902	22	10	AAATTAGAAG	2.2
64387	64415	29	10	AATATTGCTC	2.9
88505	88529	25	10	ATTGAAGTCA	2.5
93332	93352	21	10	TATAAAAAGT	2.1
110589	110609	21	10	ACAAAAAGAA	2.1
120305	120324	20	10	TAAAGACAAA	2
152115	152136	22	10	AATTAAGAAA	2.2
202467	202486	20	10	GCTAATTCTT	2
227349	227374	26	10	TAAAAATTTA	2.6
238579	238600	22	10	AAGGATCAAA	2.2
246243	246262	20	10	TATTTGTTTG	2
255168	255187	20	10	AAAATGAACA	2
262189	262208	20	10	AAAAATAAAT	2
263545	263564	20	10	ATTGAAAAAA	2
271319	271339	21	10	CAGTCAATAT	2.1
285688	285707	20	10	AATATGTAAA	2
311743	311764	22	10	GAAATGTCTA	2.2
313212	313238	27	10	TTTTTTTTAA	2.7
375320	375347	28	10	TGCTAAACAT	2.8
380963	380982	20	10	TATAAAAAAT	2
382667	382690	24	10	AAAAAAAGGA	2.4
393575	393594	20	10	AGCTAAATAT	2
398126	398151	26	10	AAACAAACAA	2.6
398252	398277	26	10	AAACAAACAA	2.6
408824	408846	23	10	TTTTAATCAT	2.3
409047	409070	24	10	TTTTATTCTT	2.4
415236	415257	22	10	TTCTAGACAT	2.2
436284	436303	20	10	TTGTTTTCCT	2
448398	448429	32	10	AAATATATAA	3.2
457999	458020	22	10	TGATAAGTTT	2.2
468433	468482	50	10	AAGCAAAAAA	5
474344	474371	28	10	ATAGTGGAGG	2.8
496436	496455	20	10	AGCTATTAAA	2
522172	522198	27	10	TGTTTAATAA	2.7
532584	532604	21	10	ATTATTTAAA	2.1
540522	540543	22	10	TTTACATAGC	2.2
543756	543780	25	10	TTTTTTAACT	2.5
591207	591227	21	10	ACATGAAAAA	2.1
629456	629475	20	10	ATTTAATATA	2
691512	691536	25	10	ATAAATAATG	2.5
711740	711761	22	10	ATATAAAAAA	2.2
731788	731814	27	10	AAAATTTTTA	2.7
734622	734643	22	10	GAAATGTCTA	2.2
742679	742709	31	10	ATTTATAAAT	3.1
746226	746251	26	10	TCTTTTTATC	2.6
777371	777390	20	10	CTAGTGCTAT	2
785963	785985	23	10	ATTTGTTTAG	2.3
842445	842469	25	10	AAAATTAGTT	2.5
844063	844082	20	10	TAGTTATATC	2
848277	848296	20	10	TATTATTGGA	2
852089	852109	21	10	TTGTTCATAA	2.1
868923	868946	24	10	AAATGATTAA	2.4
873636	873655	20	10	GCTCTTCAAT	2
902921	902940	20	10	CTAAATTGTT	2
945869	945888	20	10	AATTCTTATT	2
949133	949162	30	10	TTTCGCTTTC	3
187310	187360	51	2	CT	25.5
189031	189077	47	2	CT	23.5
749747	749781	35	3	TAA	11.6667
839961	839982	22	2	AT	11
548796	548832	37	4	AATA	9.25
493486	493509	24	3	TAT	8
911174	911212	39	5	TAAAT	7.8
733608	733638	31	4	TTAA	7.75
721796	721825	30	4	TTAA	7.5
102716	102736	21	3	TAA	7
487310	487330	21	3	TGA	7
665743	665763	21	3	TTC	7
276702	276727	26	4	TAAT	6.5
938679	938714	36	6	ATTTTT	6
881738	881755	18	3	TGA	6
482146	482174	29	5	ATAAT	5.8
454203	454225	23	4	AGTA	5.75
174761	174777	17	3	AGA	5.66667
233387	233403	17	3	CAT	5.66667
1903	1934	32	6	AAATAT	5.33333
497416	497447	32	6	CAAGAC	5.33333
566550	566565	16	3	TCA	5.33333
623728	623743	16	3	TAA	5.33333
801262	801277	16	3	ATG	5.33333
405245	405265	21	4	TAAA	5.25
709122	709142	21	4	TTTA	5.25
485907	485932	26	5	ATTAT	5.2
92519	92554	36	7	AAAATAA	5.14286
67096	67120	25	5	TTTAT	5
513503	513522	20	4	TTTA	5
703710	703724	15	3	ACC	5
